# Supplementary material
Source: PubMed Central journal article supplement (PMC6206486)
Supplement: zjv022183988s1.pdf [file zjv022183988s1.pdf]

**Supplemental Table 1. Statistical analysis of viral titers in Calu3 cells cultured at 37°C and 33°C.**

|                          | Tukey's multiple comparisons test | Significant? | Summary | p value  |
|--------------------------|-----------------------------------|--------------|---------|----------|
| 24h                      | CA/07 37°C vs. CA/07 33°C         | Yes          | ****    | < 0.0001 |
|                          | OH/09 37°C vs. OH/09 33°C         | Yes          | ***     | 0.0003   |
|                          | IA/39 37°C vs. IA/39 33°C         | Yes          | *       | 0.0329   |
|                          | MN/19 37°C vs. MN/19 33°C         | Yes          | ****    | < 0.0001 |
|                          | BRIS/59 37°C vs. BRIS/59 33°C     | Yes          | ***     | 0.0001   |
|                          | MN/45 37°C vs. MN/45 33°C         | Yes          | **      | 0.0011   |
|                          | WI/71 37°C vs. WI/71 33°C         | Yes          | *       | 0.0171   |
|                          | OH/02 37°C vs. OH/02 33°C         | No           | ns      | 0.0599   |
| TX/14 37°C vs TX/14 33°C | No                                | ns           | 0.1982  |          |
| 48h                      | CA/07 37°C vs. CA/07 33°C         | No           | ns      | 0.9883   |
|                          | OH/09 37°C vs. OH/09 33°C         | No           | ns      | > 0.9999 |
|                          | IA/39 37°C vs. IA/39 33°C         | No           | ns      | > 0.9999 |
|                          | MN/19 37°C vs. MN/19 33°C         | No           | ns      | > 0.9999 |
|                          | BRIS/59 37°C vs. BRIS/59 33°C     | No           | ns      | > 0.9999 |
|                          | MN/45 37°C vs. MN/45 33°C         | No           | ns      | 0.9731   |
|                          | WI/71 37°C vs. WI/71 33°C         | No           | ns      | 0.8041   |
|                          | OH/02 37°C vs. OH/02 33°C         | No           | ns      | > 0.9999 |
| TX/14 37°C vs TX/14 33°C | No                                | ns           | 0.924   |          |
| 72h                      | CA/07 37°C vs. CA/07 33°C         | No           | ns      | > 0.9999 |
|                          | OH/09 37°C vs. OH/09 33°C         | No           | ns      | > 0.9999 |
|                          | IA/39 37°C vs. IA/39 33°C         | No           | ns      | 0.9998   |
|                          | MN/19 37°C vs. MN/19 33°C         | No           | ns      | 0.9995   |
|                          | BRIS/59 37°C vs. BRIS/59 33°C     | No           | ns      | > 0.9999 |
|                          | MN/45 37°C vs. MN/45 33°C         | No           | ns      | > 0.9999 |
|                          | WI/71 37°C vs. WI/71 33°C         | No           | ns      | > 0.9999 |
|                          | OH/02 37°C vs. OH/02 33°C         | No           | ns      | > 0.9999 |
| TX/14 37°C vs TX/14 33°C | No                                | ns           | 0.9937  |          |

Statistical analysis was done using two-way ANOVA with Tukey's post-test.

**Supplemental Table 2. Replication kinetics differences between tested viruses.**

|                 |                   | 33°C                              |              |          |                  |
|-----------------|-------------------|-----------------------------------|--------------|----------|------------------|
|                 |                   | Tukey's multiple comparisons test | Significant? | Summary  | Adjusted P Value |
| 24 h time point | CA/07 vs. OH/09   | Yes                               | ****         | < 0.0001 |                  |
|                 | CA/07 vs. IA/39   | No                                | ns           | > 0.9999 |                  |
|                 | CA/07 vs. MN/19   | Yes                               | **           | 0.0019   |                  |
|                 | CA/07 vs. BRIS/59 | No                                | ns           | 0.065    |                  |
|                 | CA/07 vs. MN/45   | No                                | ns           | 0.8949   |                  |
|                 | CA/07 vs. WI/71   | Yes                               | **           | 0.0028   |                  |
|                 | CA/07 vs. OH/02   | No                                | ns           | 0.9229   |                  |
|                 | CA/07 vs. TX/14   | Yes                               | ***          | 0.0001   |                  |
|                 | OH/09 vs. IA/39   | Yes                               | ****         | < 0.0001 |                  |
|                 | OH/09 vs. MN/19   | No                                | ns           | 0.925    |                  |
|                 | OH/09 vs. BRIS/59 | No                                | ns           | 0.3613   |                  |
|                 | OH/09 vs. MN/45   | Yes                               | **           | 0.0093   |                  |
|                 | OH/09 vs. WI/71   | No                                | ns           | 0.8937   |                  |
|                 | OH/09 vs. OH/02   | Yes                               | **           | 0.0074   |                  |
|                 | OH/09 vs. TX/14   | No                                | ns           | 0.999    |                  |
|                 | IA/39 vs. MN/19   | Yes                               | **           | 0.0081   |                  |
|                 | IA/39 vs. BRIS/59 | No                                | ns           | 0.127    |                  |
|                 | IA/39 vs. MN/45   | No                                | ns           | 0.9113   |                  |
|                 | IA/39 vs. WI/71   | Yes                               | *            | 0.0109   |                  |
|                 | IA/39 vs. OH/02   | No                                | ns           | 0.9332   |                  |
|                 | IA/39 vs. TX/14   | Yes                               | ***          | 0.0009   |                  |
|                 | MN/19 vs. BRIS/59 | No                                | ns           | 0.9936   |                  |
|                 | MN/19 vs. MN/45   | No                                | ns           | 0.3371   |                  |
|                 | MN/19 vs. WI/71   | No                                | ns           | > 0.9999 |                  |
|                 | MN/19 vs. OH/02   | No                                | ns           | 0.2979   |                  |
|                 | MN/19 vs. TX/14   | No                                | ns           | 0.9997   |                  |
|                 | BRIS/59 vs. MN/45 | No                                | ns           | 0.9116   |                  |
|                 | BRIS/59 vs. WI/71 | No                                | ns           | 0.9969   |                  |
|                 | BRIS/59 vs. OH/02 | No                                | ns           | 0.8857   |                  |
|                 | BRIS/59 vs. TX/14 | No                                | ns           | 0.8426   |                  |
| MN/45 vs. WI/71 | No                | ns                                | 0.3915       |          |                  |
| MN/45 vs. OH/02 | No                | ns                                | > 0.9999     |          |                  |
| MN/45 vs. TX/14 | No                | ns                                | 0.0848       |          |                  |
| WI/71 vs. OH/02 | No                | ns                                | 0.3491       |          |                  |
| WI/71 vs. TX/14 | No                | ns                                | 0.9992       |          |                  |
| OH/02 vs. TX/14 | No                | ns                                | 0.0709       |          |                  |
| 48h time point  | CA/07 vs. OH/09   | Yes                               | ****         | < 0.0001 |                  |
|                 | CA/07 vs. IA/39   | Yes                               | ***          | 0.0003   |                  |

|                 |                   | 37°C                              |              |          |                  |
|-----------------|-------------------|-----------------------------------|--------------|----------|------------------|
|                 |                   | Tukey's multiple comparisons test | Significant? | Summary  | Adjusted P Value |
| 24 h time point | CA/07 vs. OH/9    | Yes                               | ****         | < 0.0001 |                  |
|                 | CA/07 vs. IA/39   | No                                | ns           | 0.9973   |                  |
|                 | CA/07 vs. MN/19   | Yes                               | ****         | < 0.0001 |                  |
|                 | CA/07 vs. BRIS/59 | Yes                               | ****         | < 0.0001 |                  |
|                 | CA/07 vs. MN/45   | No                                | ns           | 0.1974   |                  |
|                 | CA/07 vs. WI/71   | Yes                               | ****         | < 0.0001 |                  |
|                 | CA/07 vs. OH/02   | No                                | ns           | 0.9918   |                  |
|                 | CA/07 vs. TX/14   | Yes                               | ****         | < 0.0001 |                  |
|                 | OH/9 vs. IA/39    | Yes                               | ****         | < 0.0001 |                  |
|                 | OH/9 vs. MN/19    | No                                | ns           | > 0.9999 |                  |
|                 | OH/9 vs. BRIS/59  | No                                | ns           | 0.1038   |                  |
|                 | OH/9 vs. MN/45    | Yes                               | ****         | < 0.0001 |                  |
|                 | OH/9 vs. WI/71    | Yes                               | *            | 0.0435   |                  |
|                 | OH/9 vs. OH/02    | Yes                               | ****         | < 0.0001 |                  |
|                 | OH/9 vs. TX/14    | Yes                               | *            | 0.0386   |                  |
|                 | IA/39 vs. MN/19   | Yes                               | ****         | < 0.0001 |                  |
|                 | IA/39 vs. BRIS/59 | Yes                               | ****         | < 0.0001 |                  |
|                 | IA/39 vs. MN/45   | No                                | ns           | 0.0807   |                  |
|                 | IA/39 vs. WI/71   | Yes                               | ****         | < 0.0001 |                  |
|                 | IA/39 vs. OH/02   | No                                | ns           | 0.8427   |                  |
|                 | IA/39 vs. TX/14   | Yes                               | ****         | < 0.0001 |                  |
|                 | MN/19 vs. BRIS/59 | Yes                               | *            | 0.0255   |                  |
|                 | MN/19 vs. MN/45   | Yes                               | ****         | < 0.0001 |                  |
|                 | MN/19 vs. WI/71   | Yes                               | **           | 0.0091   |                  |
|                 | MN/19 vs. OH/02   | Yes                               | ****         | < 0.0001 |                  |
|                 | MN/19 vs. TX/14   | Yes                               | **           | 0.0079   |                  |
|                 | BRIS/59 vs. MN/45 | No                                | ns           | 0.2585   |                  |
|                 | BRIS/59 vs. WI/71 | No                                | ns           | > 0.9999 |                  |
|                 | BRIS/59 vs. OH/02 | Yes                               | **           | 0.0047   |                  |
|                 | BRIS/59 vs. TX/14 | No                                | ns           | > 0.9999 |                  |
| MN/45 vs. WI/71 | No                | ns                                | 0.4538       |          |                  |
| MN/45 vs. OH/02 | No                | ns                                | 0.9047       |          |                  |
| MN/45 vs. TX/14 | No                | ns                                | 0.4819       |          |                  |
| WI/71 vs. OH/02 | Yes               | *                                 | 0.014        |          |                  |
| WI/71 vs. TX/14 | No                | ns                                | > 0.9999     |          |                  |
| OH/02 vs. TX/14 | Yes               | *                                 | 0.0159       |          |                  |
| 48h time point  | CA/07 vs. OH/9    | Yes                               | ****         | < 0.0001 |                  |
|                 | CA/07 vs. IA/39   | Yes                               | **           | 0.0011   |                  |

|                |                   |     |      |          |
|----------------|-------------------|-----|------|----------|
|                | CA/07 vs. MN/19   | Yes | **** | < 0.0001 |
|                | CA/07 vs. BRIS/59 | Yes | **** | < 0.0001 |
|                | CA/07 vs. MN/45   | Yes | *    | 0.0325   |
|                | CA/07 vs. WI/71   | Yes | **** | < 0.0001 |
|                | CA/07 vs. OH/02   | Yes | **** | < 0.0001 |
|                | CA/07 vs. TX/14   | Yes | **** | < 0.0001 |
|                | OH/09 vs. IA/39   | No  | ns   | 0.8053   |
|                | OH/09 vs. MN/19   | No  | ns   | 0.4651   |
|                | OH/09 vs. BRIS/59 | No  | ns   | 0.9954   |
|                | OH/09 vs. MN/45   | No  | ns   | 0.1299   |
|                | OH/09 vs. WI/71   | No  | ns   | 0.9998   |
|                | OH/09 vs. OH/02   | No  | ns   | 0.9996   |
|                | OH/09 vs. TX/14   | No  | ns   | > 0.9999 |
|                | IA/39 vs. MN/19   | Yes | **   | 0.0073   |
|                | IA/39 vs. BRIS/59 | No  | ns   | 0.2338   |
|                | IA/39 vs. MN/45   | No  | ns   | 0.9719   |
|                | IA/39 vs. WI/71   | No  | ns   | 0.409    |
|                | IA/39 vs. OH/02   | No  | ns   | 0.9916   |
|                | IA/39 vs. TX/14   | No  | ns   | 0.9119   |
|                | MN/19 vs. BRIS/59 | No  | ns   | 0.9561   |
|                | MN/19 vs. MN/45   | Yes | **** | < 0.0001 |
|                | MN/19 vs. WI/71   | No  | ns   | 0.849    |
|                | MN/19 vs. OH/02   | No  | ns   | 0.1274   |
|                | MN/19 vs. TX/14   | No  | ns   | 0.3163   |
|                | BRIS/59 vs. MN/45 | Yes | **   | 0.0097   |
|                | BRIS/59 vs. WI/71 | No  | ns   | > 0.9999 |
|                | BRIS/59 vs. OH/02 | No  | ns   | 0.8455   |
|                | BRIS/59 vs. TX/14 | No  | ns   | 0.9765   |
|                | MN/45 vs. WI/71   | Yes | *    | 0.0256   |
|                | MN/45 vs. OH/02   | No  | ns   | 0.4705   |
|                | MN/45 vs. TX/14   | No  | ns   | 0.2194   |
|                | WI/71 vs. OH/02   | No  | ns   | 0.9546   |
|                | WI/71 vs. TX/14   | No  | ns   | 0.9976   |
|                | OH/02 vs. TX/14   | No  | ns   | > 0.9999 |
| 72h time point | CA/07 vs. OH/09   | Yes | **** | < 0.0001 |
|                | CA/07 vs. IA/39   | Yes | ***  | 0.0005   |
|                | CA/07 vs. MN/19   | Yes | **** | < 0.0001 |
|                | CA/07 vs. BRIS/59 | Yes | **** | < 0.0001 |
|                | CA/07 vs. MN/45   | Yes | *    | 0.0154   |
|                | CA/07 vs. WI/71   | Yes | **** | < 0.0001 |
|                | CA/07 vs. OH/02   | Yes | **** | < 0.0001 |
|                | CA/07 vs. TX/14   | Yes | **** | < 0.0001 |

|                |                   |     |      |          |
|----------------|-------------------|-----|------|----------|
|                | CA/07 vs. MN/19   | Yes | **** | < 0.0001 |
|                | CA/07 vs. BRIS/59 | Yes | **** | < 0.0001 |
|                | CA/07 vs. MN/45   | Yes | **** | < 0.0001 |
|                | CA/07 vs. WI/71   | Yes | **** | < 0.0001 |
|                | CA/07 vs. OH/02   | Yes | **** | < 0.0001 |
|                | CA/07 vs. TX/14   | Yes | ***  | 0.0007   |
|                | OH/9 vs. IA/39    | Yes | *    | 0.0154   |
|                | OH/9 vs. MN/19    | No  | ns   | 0.9953   |
|                | OH/9 vs. BRIS/59  | No  | ns   | > 0.9999 |
|                | OH/9 vs. MN/45    | No  | ns   | 0.1452   |
|                | OH/9 vs. WI/71    | No  | ns   | 0.3303   |
|                | OH/9 vs. OH/02    | No  | ns   | 0.994    |
|                | OH/9 vs. TX/14    | Yes | *    | 0.0218   |
|                | IA/39 vs. MN/19   | Yes | ***  | 0.0006   |
|                | IA/39 vs. BRIS/59 | Yes | *    | 0.0394   |
|                | IA/39 vs. MN/45   | No  | ns   | 0.998    |
|                | IA/39 vs. WI/71   | Yes | **** | < 0.0001 |
|                | IA/39 vs. OH/02   | No  | ns   | 0.1933   |
|                | IA/39 vs. TX/14   | No  | ns   | > 0.9999 |
|                | MN/19 vs. BRIS/59 | No  | ns   | 0.9637   |
|                | MN/19 vs. MN/45   | Yes | *    | 0.0112   |
|                | MN/19 vs. WI/71   | No  | ns   | 0.8928   |
|                | MN/19 vs. OH/02   | No  | ns   | 0.684    |
|                | MN/19 vs. TX/14   | Yes | ***  | 0.001    |
|                | BRIS/59 vs. MN/45 | No  | ns   | 0.2803   |
|                | BRIS/59 vs. WI/71 | No  | ns   | 0.1776   |
|                | BRIS/59 vs. OH/02 | No  | ns   | 0.9997   |
|                | BRIS/59 vs. TX/14 | No  | ns   | 0.0541   |
|                | MN/45 vs. WI/71   | Yes | **** | < 0.0001 |
|                | MN/45 vs. OH/02   | No  | ns   | 0.6911   |
|                | MN/45 vs. TX/14   | No  | ns   | 0.9994   |
|                | WI/71 vs. OH/02   | Yes | *    | 0.0352   |
|                | WI/71 vs. TX/14   | Yes | **** | < 0.0001 |
|                | OH/02 vs. TX/14   | No  | ns   | 0.2441   |
| 72h time point | CA/07 vs. OH/9    | Yes | **** | < 0.0001 |
|                | CA/07 vs. IA/39   | Yes | ***  | 0.0007   |
|                | CA/07 vs. MN/19   | Yes | **** | < 0.0001 |
|                | CA/07 vs. BRIS/59 | Yes | **** | < 0.0001 |
|                | CA/07 vs. MN/45   | Yes | **** | < 0.0001 |
|                | CA/07 vs. WI/71   | Yes | **** | < 0.0001 |
|                | CA/07 vs. OH/02   | Yes | **** | < 0.0001 |
|                | CA/07 vs. TX/14   | Yes | **** | < 0.0001 |

|                   |     |    |          |
|-------------------|-----|----|----------|
| OH/09 vs. IA/39   | No  | ns | 0.9159   |
| OH/09 vs. MN/19   | No  | ns | 0.8617   |
| OH/09 vs. BRIS/59 | No  | ns | 0.9973   |
| OH/09 vs. MN/45   | No  | ns | 0.412    |
| OH/09 vs. WI/71   | No  | ns | 0.804    |
| OH/09 vs. OH/02   | No  | ns | 0.9991   |
| OH/09 vs. TX/14   | No  | ns | 0.9998   |
| IA/39 vs. MN/19   | No  | ns | 0.097    |
| IA/39 vs. BRIS/59 | No  | ns | 0.4081   |
| IA/39 vs. MN/45   | No  | ns | 0.9974   |
| IA/39 vs. WI/71   | No  | ns | 0.0723   |
| IA/39 vs. OH/02   | No  | ns | 0.9996   |
| IA/39 vs. TX/14   | No  | ns | 0.9986   |
| MN/19 vs. BRIS/59 | No  | ns | 0.9994   |
| MN/19 vs. MN/45   | Yes | ** | 0.0081   |
| MN/19 vs. WI/71   | No  | ns | > 0.9999 |
| MN/19 vs. OH/02   | No  | ns | 0.3949   |
| MN/19 vs. TX/14   | No  | ns | 0.4658   |
| BRIS/59 vs. MN/45 | No  | ns | 0.066    |
| BRIS/59 vs. WI/71 | No  | ns | 0.9981   |
| BRIS/59 vs. OH/02 | No  | ns | 0.8434   |
| BRIS/59 vs. TX/14 | No  | ns | 0.8912   |
| MN/45 vs. WI/71   | Yes | ** | 0.0055   |
| MN/45 vs. OH/02   | No  | ns | 0.8735   |
| MN/45 vs. TX/14   | No  | ns | 0.8218   |
| WI/71 vs. OH/02   | No  | ns | 0.3252   |
| WI/71 vs. TX/14   | No  | ns | 0.3907   |
| OH/02 vs. TX/14   | No  | ns | > 0.9999 |

|                   |     |      |          |
|-------------------|-----|------|----------|
| OH/9 vs. IA/39    | No  | ns   | 0.0617   |
| OH/9 vs. MN/19    | No  | ns   | 0.9989   |
| OH/9 vs. BRIS/59  | No  | ns   | 0.7261   |
| OH/9 vs. MN/45    | No  | ns   | 0.403    |
| OH/9 vs. WI/71    | No  | ns   | 0.1014   |
| OH/9 vs. OH/02    | No  | ns   | 0.9964   |
| OH/9 vs. TX/14    | No  | ns   | 0.2727   |
| IA/39 vs. MN/19   | Yes | **   | 0.006    |
| IA/39 vs. BRIS/59 | Yes | ***  | 0.0001   |
| IA/39 vs. MN/45   | No  | ns   | 0.997    |
| IA/39 vs. WI/71   | Yes | **** | < 0.0001 |
| IA/39 vs. OH/02   | No  | ns   | 0.4164   |
| IA/39 vs. TX/14   | No  | ns   | 0.9997   |
| MN/19 vs. BRIS/59 | No  | ns   | 0.9885   |
| MN/19 vs. MN/45   | No  | ns   | 0.081    |
| MN/19 vs. WI/71   | No  | ns   | 0.4612   |
| MN/19 vs. OH/02   | No  | ns   | 0.8148   |
| MN/19 vs. TX/14   | Yes | *    | 0.0444   |
| BRIS/59 vs. MN/45 | Yes | **   | 0.0033   |
| BRIS/59 vs. WI/71 | No  | ns   | 0.9765   |
| BRIS/59 vs. OH/02 | No  | ns   | 0.1876   |
| BRIS/59 vs. TX/14 | Yes | **   | 0.0015   |
| MN/45 vs. WI/71   | Yes | **** | < 0.0001 |
| MN/45 vs. OH/02   | No  | ns   | 0.9238   |
| MN/45 vs. TX/14   | No  | ns   | > 0.9999 |
| WI/71 vs. OH/02   | Yes | **   | 0.0076   |
| WI/71 vs. TX/14   | Yes | **** | < 0.0001 |
| OH/02 vs. TX/14   | No  | ns   | 0.8318   |

**Supplemental Table 3. Comparison of viral replication in mouse lung and nose tissues.**

|             | Tukey's multiple comparisons test | Significant? | Summary | Adjusted P Value |
|-------------|-----------------------------------|--------------|---------|------------------|
| lungs day 3 | OH/9 vs. IA/39                    | No           | ns      | 0.9244           |
|             | OH/9 vs. CA/07                    | No           | ns      | 0.6437           |
|             | OH/9 vs. MN/19                    | No           | ns      | 0.9998           |
|             | OH/9 vs. MN/45                    | No           | ns      | 0.9997           |
|             | OH/9 vs. WI/71                    | Yes          | *       | 0.0106           |
|             | IA/39 vs. CA/07                   | No           | ns      | 0.9919           |
|             | IA/39 vs. MN/19                   | No           | ns      | 0.8243           |
|             | IA/39 vs. MN/45                   | No           | ns      | 0.8076           |
|             | IA/39 vs. WI/71                   | Yes          | **      | 0.001            |
|             | CA/07 vs. MN/19                   | No           | ns      | 0.4898           |
|             | CA/07 vs. MN/45                   | No           | ns      | 0.4697           |
|             | CA/07 vs. WI/71                   | Yes          | ***     | 0.0002           |
|             | MN/19 vs. MN/45                   | No           | ns      | > 0.9999         |
|             | MN/19 vs. WI/71                   | Yes          | *       | 0.0191           |
|             | MN/45 vs. WI/71                   | Yes          | *       | 0.0207           |
| lungs day 6 | OH/9 vs. IA/39                    | Yes          | ****    | < 0.0001         |
|             | OH/9 vs. CA/07                    | No           | ns      | > 0.9999         |
|             | OH/9 vs. MN/19                    | Yes          | *       | 0.0102           |
|             | OH/9 vs. MN/45                    | Yes          | ***     | 0.0006           |
|             | OH/9 vs. WI/71                    | Yes          | **      | 0.0058           |
|             | IA/39 vs. CA/07                   | Yes          | ****    | < 0.0001         |
|             | IA/39 vs. MN/19                   | No           | ns      | 0.1242           |
|             | IA/39 vs. MN/45                   | No           | ns      | 0.6916           |
|             | IA/39 vs. WI/71                   | No           | ns      | 0.1907           |
|             | CA/07 vs. MN/19                   | Yes          | *       | 0.0137           |
|             | CA/07 vs. MN/45                   | Yes          | ***     | 0.0008           |
|             | CA/07 vs. WI/71                   | Yes          | **      | 0.0079           |
|             | MN/19 vs. MN/45                   | No           | ns      | 0.8385           |
|             | MN/19 vs. WI/71                   | No           | ns      | 0.9999           |
|             | MN/45 vs. WI/71                   | No           | ns      | 0.9274           |
| nose day 3  | OH/9 vs. IA/39                    | No           | ns      | 0.0517           |
|             | OH/9 vs. CA/07                    | Yes          | *       | 0.0134           |
|             | OH/9 vs. MN/19                    | No           | ns      | > 0.9999         |
|             | OH/9 vs. MN/45                    | Yes          | **      | 0.0065           |
|             | OH/9 vs. WI/71                    | No           | ns      | 0.0528           |
|             | IA/39 vs. CA/07                   | No           | ns      | 0.6378           |
|             | IA/39 vs. MN/19                   | Yes          | *       | 0.0361           |
|             | IA/39 vs. MN/45                   | No           | ns      | 0.9233           |
|             | IA/39 vs. WI/71                   | Yes          | ****    | < 0.0001         |

|            |                 |     |      |          |
|------------|-----------------|-----|------|----------|
|            | CA/07 vs. MN/19 | Yes | *    | 0.0102   |
|            | CA/07 vs. MN/45 | No  | ns   | 0.95     |
|            | CA/07 vs. WI/71 | Yes | ***  | 0.0001   |
|            | MN/19 vs. MN/45 | Yes | **   | 0.0044   |
|            | MN/19 vs. WI/71 | No  | ns   | 0.075    |
|            | MN/45 vs. WI/71 | Yes | **** | < 0.0001 |
| nose day 6 | OH/9 vs. IA/39  | No  | ns   | 0.5001   |
|            | OH/9 vs. CA/07  | Yes | ***  | 0.0004   |
|            | OH/9 vs. MN/19  | No  | ns   | 0.4294   |
|            | OH/9 vs. MN/45  | Yes | **** | < 0.0001 |
|            | OH/9 vs. WI/71  | Yes | **   | 0.0018   |
|            | IA/39 vs. CA/07 | Yes | **   | 0.006    |
|            | IA/39 vs. MN/19 | No  | ns   | > 0.9999 |
|            | IA/39 vs. MN/45 | Yes | **** | < 0.0001 |
|            | IA/39 vs. WI/71 | No  | ns   | 0.0833   |
|            | CA/07 vs. MN/19 | Yes | **   | 0.0073   |
|            | CA/07 vs. MN/45 | No  | ns   | 0.9774   |
|            | CA/07 vs. WI/71 | No  | ns   | 0.3352   |
|            | MN/19 vs. MN/45 | Yes | **** | < 0.0001 |
|            | MN/19 vs. WI/71 | No  | ns   | 0.1055   |
|            | MN/45 vs. WI/71 | Yes | **   | 0.0087   |
